# Supplementary material
Source: publisher site journal article supplement (https://www.spandidos-publications.com/4189/downloadSupplementary)

Figure S1. Proof of transfection in KG and K562 cells. (A-C) Successful transfection of si-TRIB2 relative to si-NC in KG cells. (D-F) Successful overexpression of TRIB2 in K562 cells relative to the empty pCDH-NC vector. (G and H) Successful transfection of GV141-Fos in KG and K562 cells relative to the empty GV141 vector. (I-K) Successful transfection of miR-33a-5p mimics and inhibitors relative to their respective controls in KG cells. Magnification, x200. \* $P < 0.05$ , \*\* $P < 0.01$  and \*\*\* $P < 0.001$ . TRIB2, tribbles pseudokinase 2; NC, negative control; si, small interfering RNA; miR, microRNA.

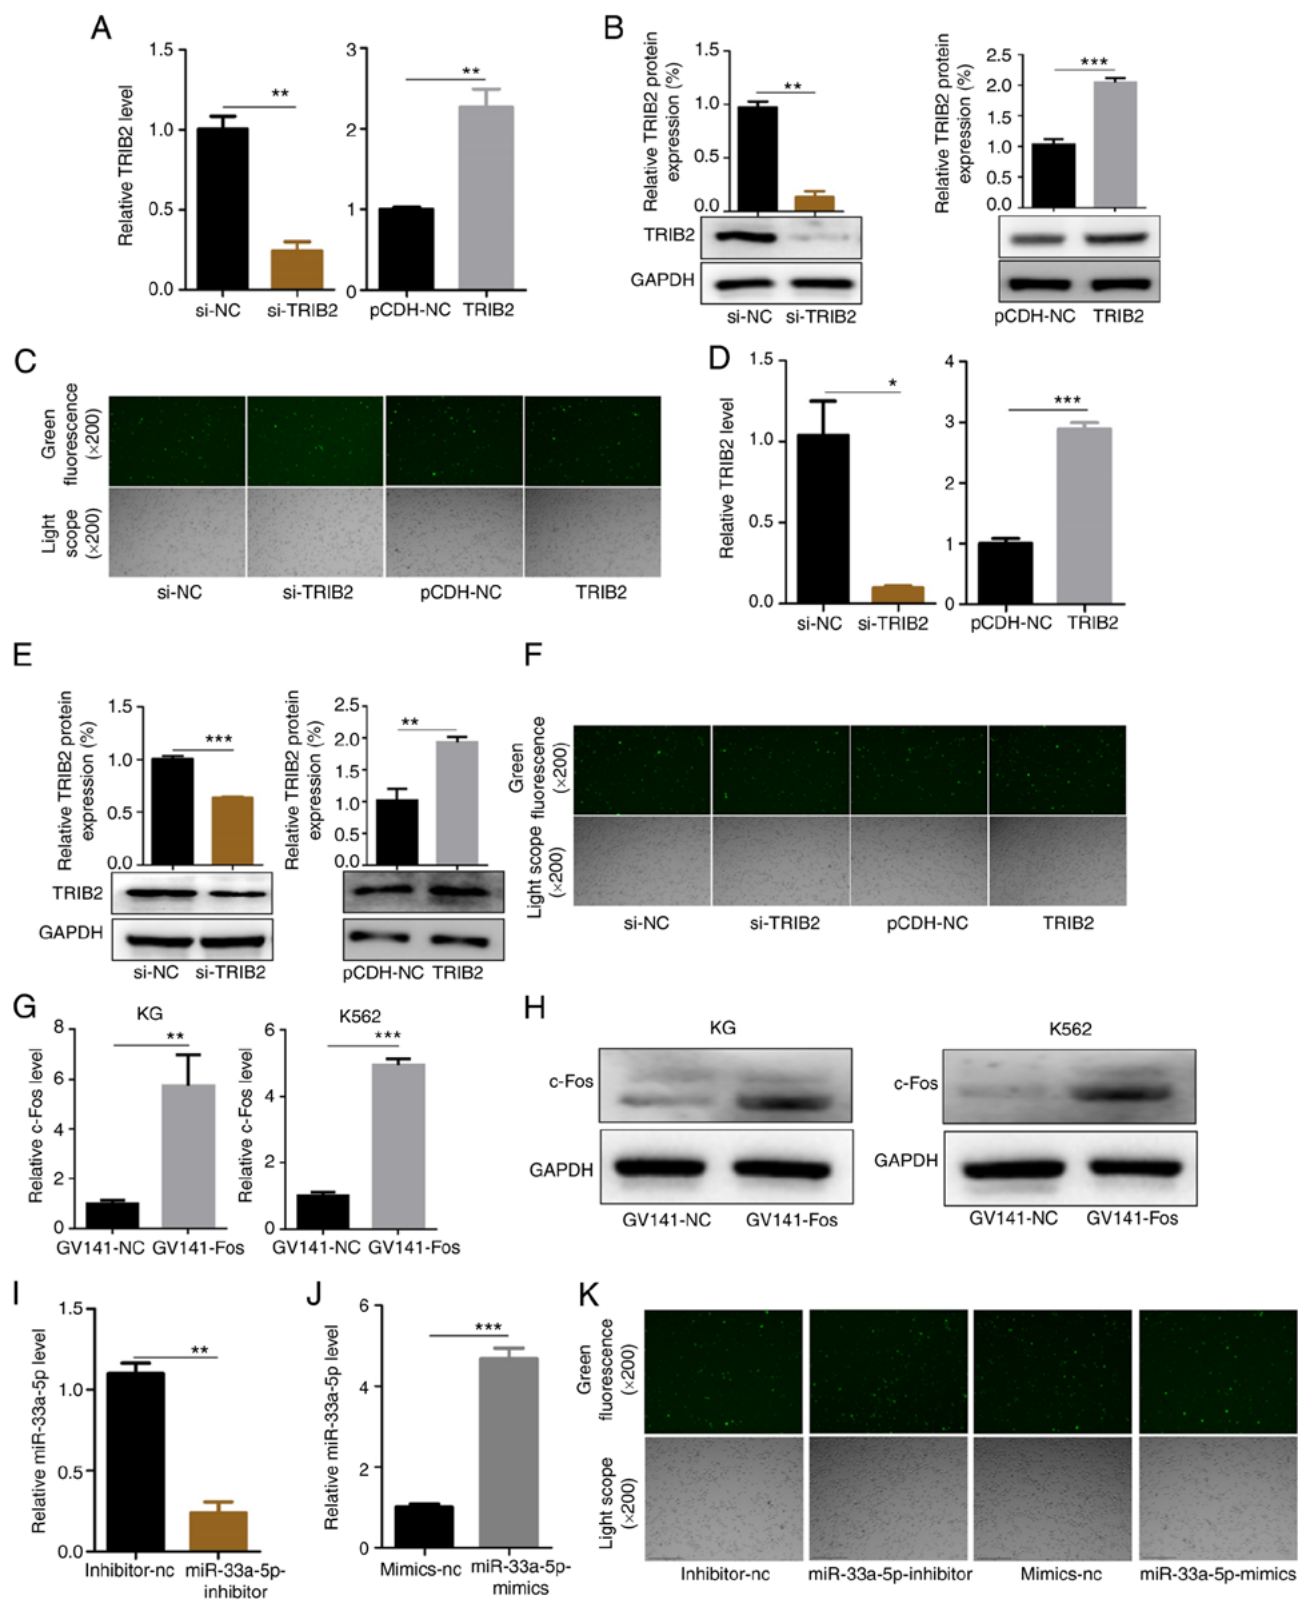

Supplement: Supplementary file 1 [file downloadSupplementary]
